# Supplementary material for: A hierarchical oxygen vacancy-rich WO3 with “nanowire-array-on-nanosheet-array” structure for highly efficient oxygen evolution reaction
Source: Royal Society of Chemistry journal article supplement (doi:10.1039/c9ta01044k), 2019-01-01
Supplement: c9ta01044k1.pdf [file c9ta01044k1.pdf]

## Electronic Supplementary Information

### **Hierarchical Oxygen Vacancies-Rich WO<sub>3</sub> with “Nanowire-Array-on-Nanosheet-Array” Structure for Highly Efficient Oxygen Evolution Reaction**

Jinxiang Diao,<sup>‡ab</sup> Wenyu Yuan,<sup>‡cd</sup> Yu Qiu,<sup>a</sup> Laifei Cheng,<sup>c</sup> Xiaohui Guo<sup>a\*</sup>

<sup>a</sup>Key Lab of Synthetic and Natural Functional Molecule Chemistry of Ministry of Education, and the College of Chemistry and Materials Science, Northwest University, Xi'an 710069, P. R. China

<sup>b</sup>School of Aeronautical Materials Engineering, Aeronautical Polytechnic Institute, Xi'an 710089, P. R. China

<sup>c</sup>Science and Technology on Thermostructural Composite Materials Laboratory, Northwestern Polytechnical University, Xi'an 710072, P. R. China

<sup>d</sup>Global Research Center for Environment and Energy based on Nanomaterials Science (GREEN), National Institute for Materials Science (NIMS), Tsukuba 305-0044, Japan

<sup>‡</sup>These authors (Jinxiang Diao and Wenyu Yuan ) contributed equally to this work

\*Corresponding author: [guoxh2009@nwu.edu.cn](mailto:guoxh2009@nwu.edu.cn) (Xiaohui Guo)

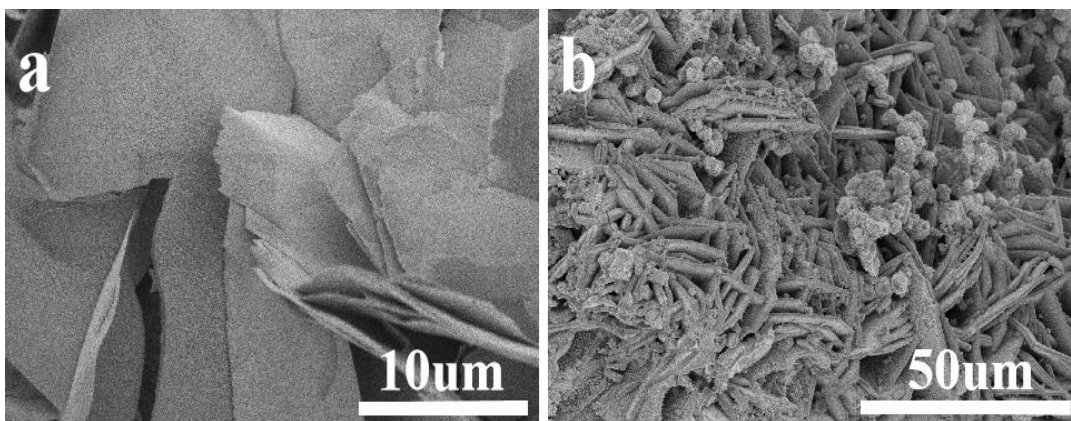

Fig. S1 The SEM image of  $\text{WO}_3$  NSs (a) and disordered  $\text{WO}_3$ (b)

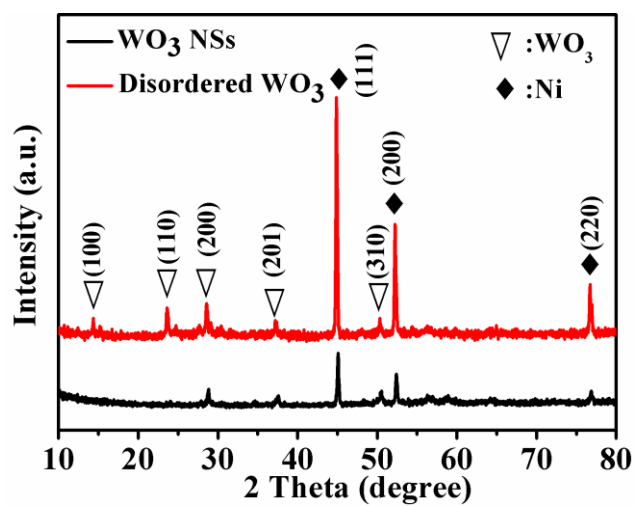

Fig. S2 The XRD patterns of  $\text{WO}_3$  NSs and disordered  $\text{WO}_3$

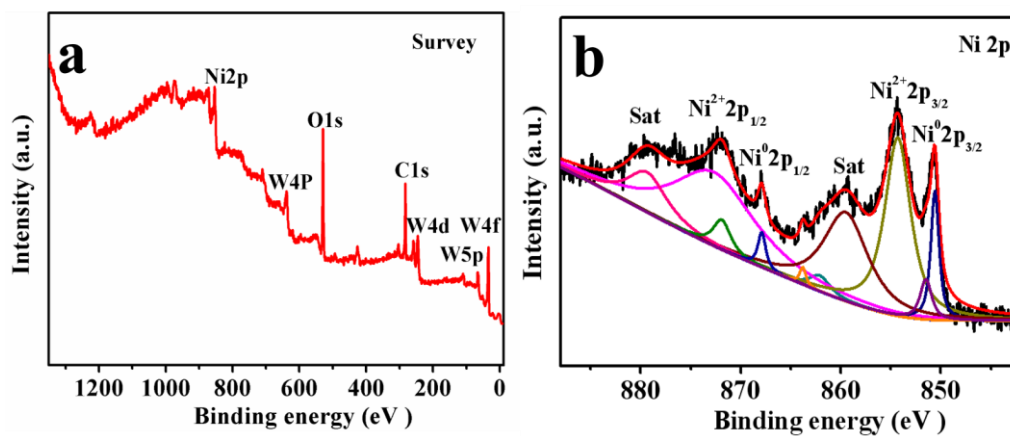

Fig. S3 The XPS survey spectra (a) and Ni 2p XPS spectra (b) of  $\text{WO}_3$  NWA-NSA catalyst

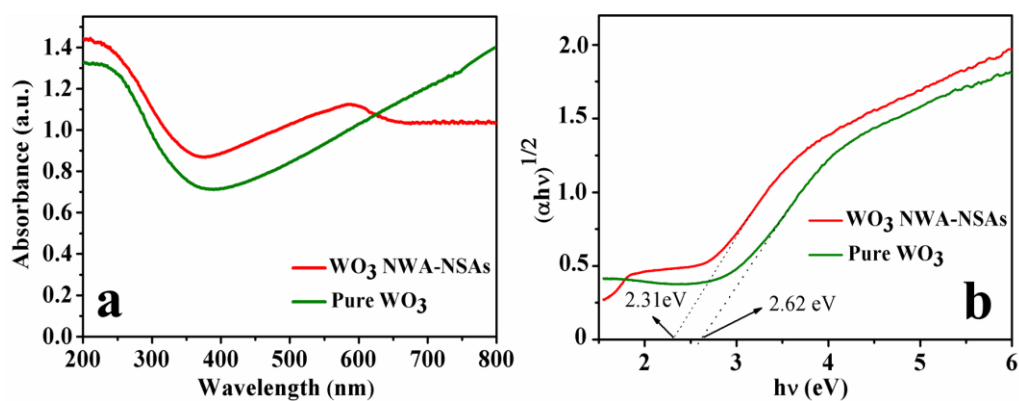

Fig. S4 (a) UV-vis spectra and (b)  $\alpha h\nu^{1/2}$  versus photon-energy plot of WO<sub>3</sub> NWA-NSA catalyst and pure WO<sub>3</sub>

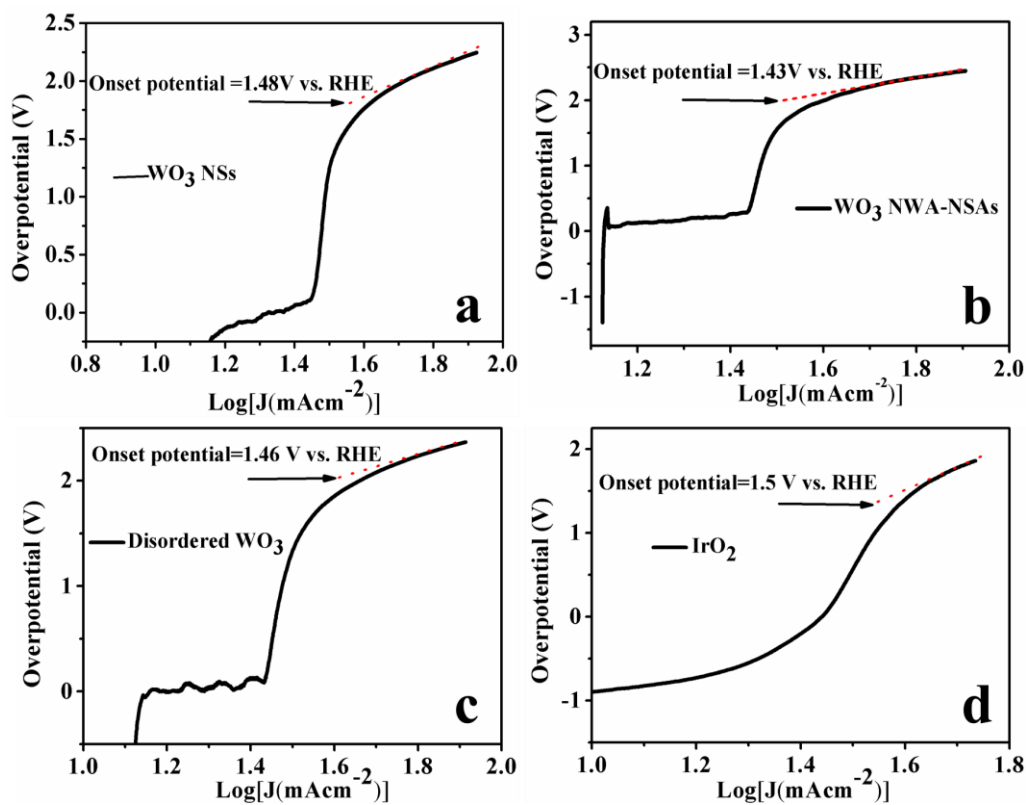

Fig. S5 The plots of overpotential vs.  $\log[J/(mA\ cm^{-2})]$  for WO<sub>3</sub> NSs, WO<sub>3</sub> NWA-NSAs, disordered WO<sub>3</sub> and IrO<sub>2</sub>, respectively

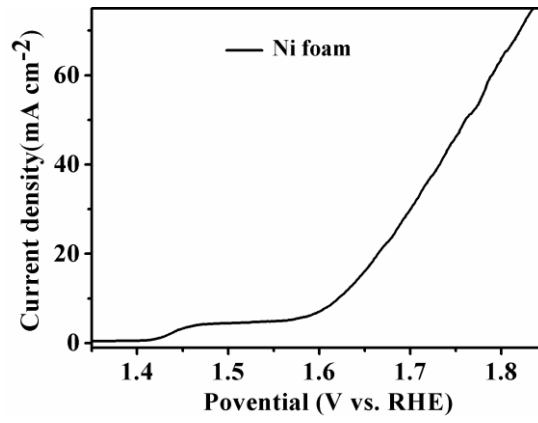

Fig. S6 LSV polarization curve of Ni foam treated under same condition for 6 h without the addition of ATT.

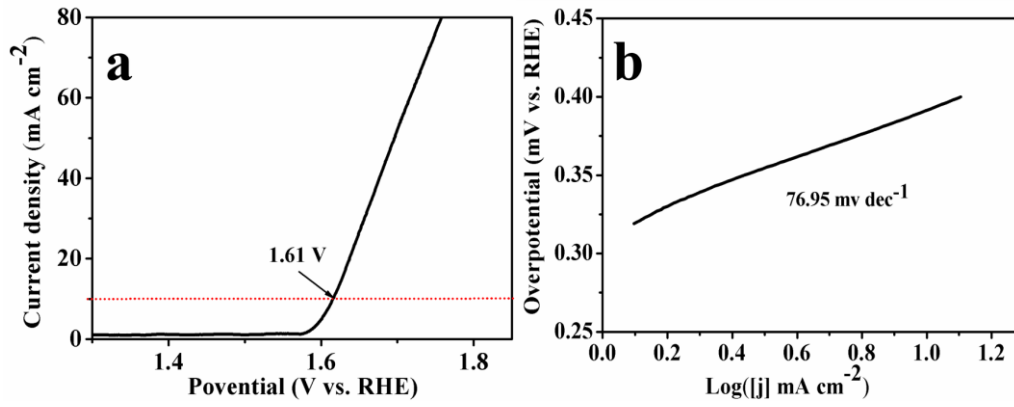

Fig. S7 The LSV polarization curve (a) and Tafel plot (b) of WO<sub>3</sub> with less oxygen vacancies.

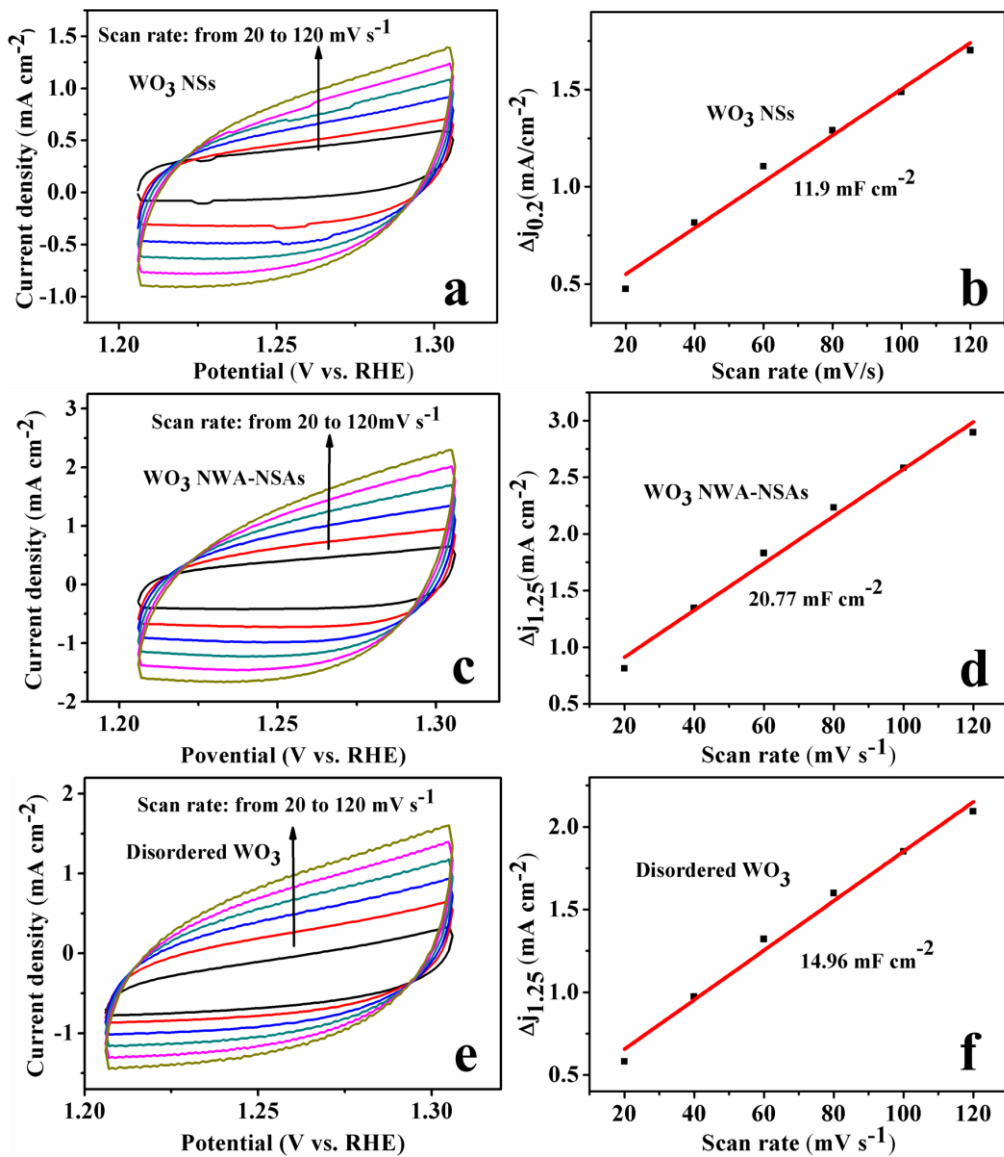

Fig. S8 The CV (a, c, e) and ECSA (b, d, f) of WO<sub>3</sub> NSs, WO<sub>3</sub> NWA-NSAs and disordered WO<sub>3</sub>

Table S1. The comparison of WO<sub>3</sub> NSA-NWAs and the reported Ni foam supported OER catalysts

| Materials                                  | Mass loading on Ni foam (mg cm <sup>-2</sup> ) | Working electrode area (cm <sup>2</sup> ) | Electrolyte | Onset potential (V vs. RHE) | Overpotential (V at 10 mA cm <sup>-2</sup> ) | Tafel slope (mV dec <sup>-1</sup> ) | References |
|--------------------------------------------|------------------------------------------------|-------------------------------------------|-------------|-----------------------------|----------------------------------------------|-------------------------------------|------------|
| WO <sub>3</sub> NSA-NWAs                   | 26                                             | 0.25                                      | 1 M KOH     | 0.20                        | 0.23                                         | 33                                  | This work  |
| Ni <sub>3</sub> Se <sub>2</sub>            | 8.87                                           | 1                                         | 1 M KOH     | ~0.22                       | ~0.24                                        | 144                                 | S1         |
| NiO                                        | 5                                              | 4.84                                      | 1 M KOH     | 0.32                        | 0.41                                         | 109                                 | S2         |
| NiSe <sub>2</sub> /Graphene                | 2.5                                            | 3                                         | 0.1 M KOH   | \                           | ~0.30                                        | 89                                  | S3         |
| MoS <sub>2</sub>                           | 25                                             | 1                                         | 1M KOH      | ~0.25                       | \                                            | 105                                 | S4         |
| Carbon dots/Ni <sub>3</sub> S <sub>2</sub> | 4.2                                            | 4                                         | 1M KOH      | \                           | 0.27                                         | 67                                  | S5         |
| Ni <sub>3</sub> S <sub>2</sub> /Ni foam    | 2.5                                            | 8                                         | 1M KOH      | 0.30                        | \                                            | 95.4                                | S6         |
| Co <sub>3</sub> O <sub>4</sub> -C          | 1.8                                            | 12                                        | 0.1M KOH    | \                           | 0.32                                         | 73                                  | S7         |
| Ni-Fe-O                                    | 5.4                                            | 1                                         | 1 M KOH     | 0.24                        | 0.27                                         | \                                   | S8         |

Table S2. The comparison of  $\text{WO}_3$  NSA-NWAs and the reported OER catalyst powders dipped on glassy carbon electrodes

| Materials                                                           | Electrolyte | Onset potential(mV vs. RHE) | Overpotential (mV at10 $\text{mA cm}^{-2}$ ) | Tafel slope ( $\text{mV}\cdot\text{dec}^{-1}$ ) | References |
|---------------------------------------------------------------------|-------------|-----------------------------|----------------------------------------------|-------------------------------------------------|------------|
| $\text{WO}_3$ NSA-NWAs                                              | 1M KOH      | 200                         | 230                                          | 30                                              | This work  |
| NiFe                                                                | 1M KOH      | 200                         | 320                                          | 113                                             | S9         |
| N-Co-Fe-LDH                                                         | 1M KOH      | 240                         | 280                                          | 57.37                                           | S10        |
| $\text{SrCo}_{0.4}\text{Fe}_{0.2}\text{W}_{0.4}\text{O}_{3-\delta}$ | 1M KOH      | 296                         | 399                                          | 50                                              | S11        |
| Co-Fe-P                                                             | 0.1M KOH    | 230                         | 325                                          | 98.1                                            | S12        |
| NiCo@NiCoO <sub>2</sub>                                             | 1M KOH      | 270                         | 315                                          | 83.97                                           | S13        |
| $\text{IrO}_2/\text{MoO}_3$                                         | 0.1M NaOH   | 230                         | 360                                          | 55                                              | S14        |
| Ni-MnO/rGO                                                          | 0.1M KOH    | 270                         | 370                                          | 82                                              | S15        |
| Fe-Ni <sub>3</sub> C                                                | 1.0 KOH     | 250                         | 275                                          | 62                                              | S16        |
| CoOx/Graphene                                                       | 0.1M KOH    | 240                         | 295                                          | 57                                              | S17        |

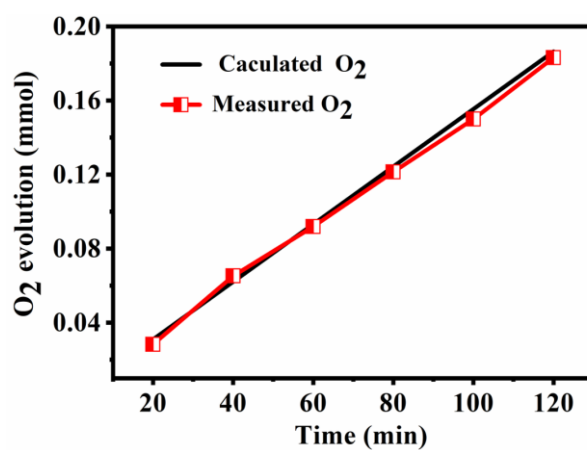

Fig. S9 the oxygen production of WO<sub>3</sub> NWA-NSA at the current density of 10 mA cm<sup>-2</sup> for 120 min

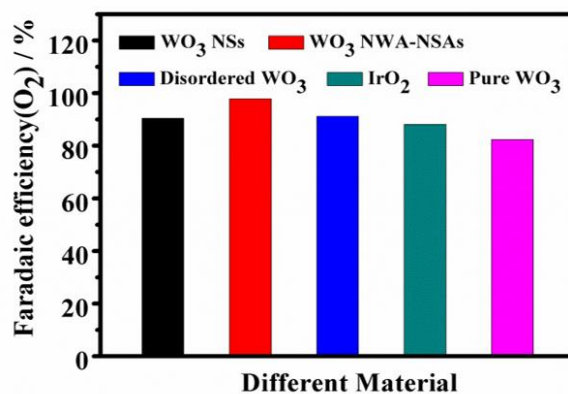

Fig. S10 FEs of WO<sub>3</sub> NSs, WO<sub>3</sub> NWA-NSAs, disordered WO<sub>3</sub>, IrO<sub>2</sub> and pure WO<sub>3</sub> at potential of 1.55 V

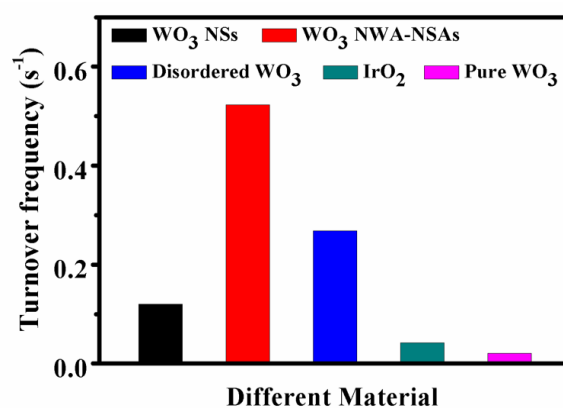

Fig. S11 TOFs of WO<sub>3</sub> NSs, WO<sub>3</sub> NWA-NSAs, disordered WO<sub>3</sub>, IrO<sub>2</sub> and pure WO<sub>3</sub> under 1.55 V



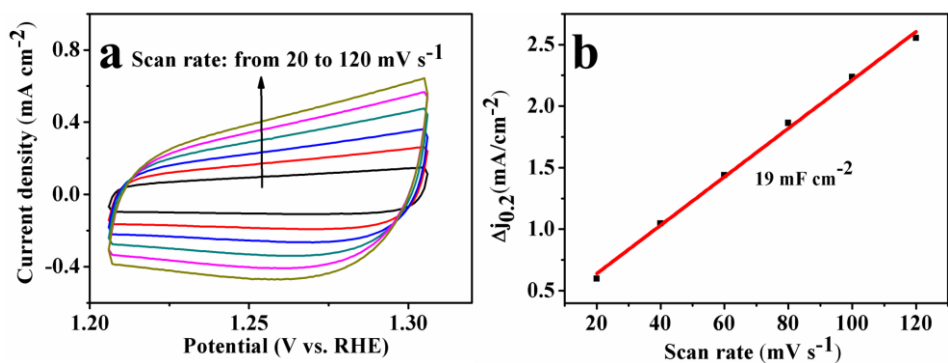

Fig. S12 ECSA of WO<sub>3</sub>NWA-NSA catalyst after cycling test

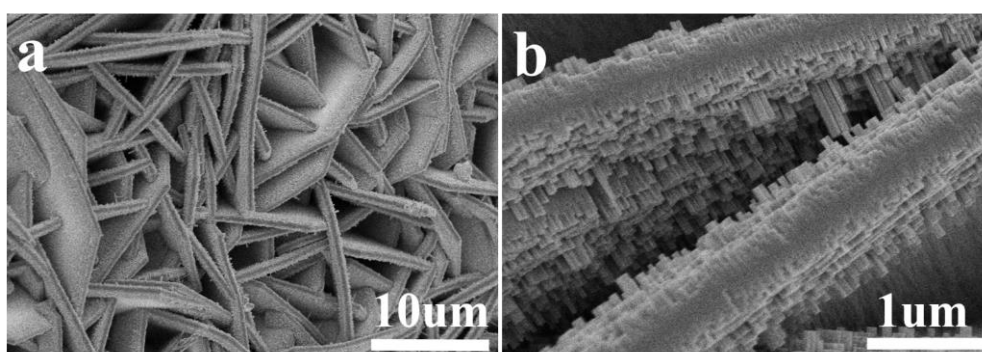

Fig. S13 SEM images of WO<sub>3</sub>NWA-NSA catalyst after cycling test

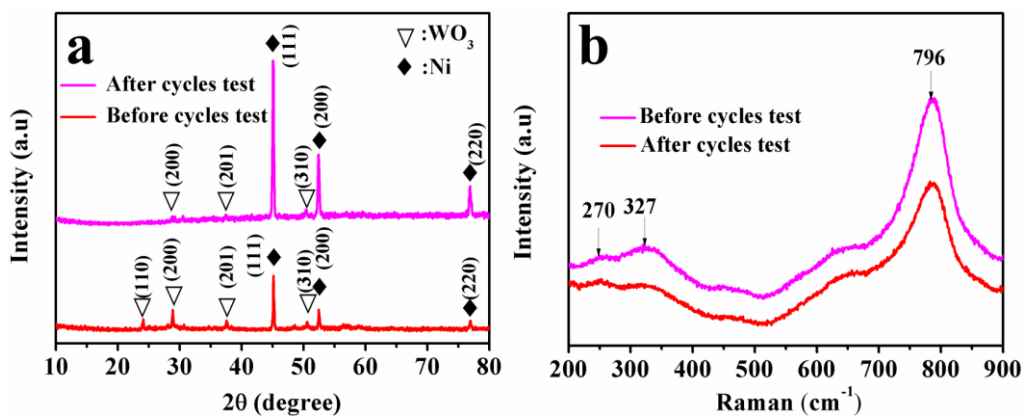

Fig. S14 XRD and Raman spectra of WO<sub>3</sub> NWA-NSA catalyst after cycling test

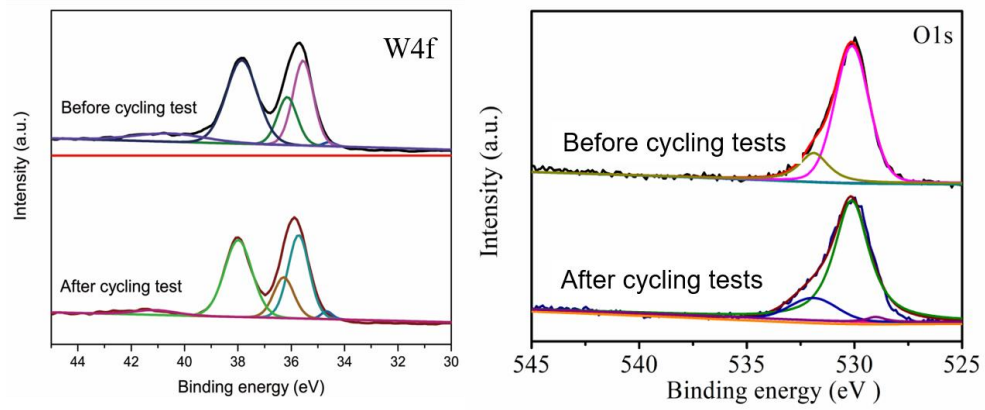

Fig. S15 XPS spectra of WO<sub>3</sub>NWA-NSA catalyst after cycling test

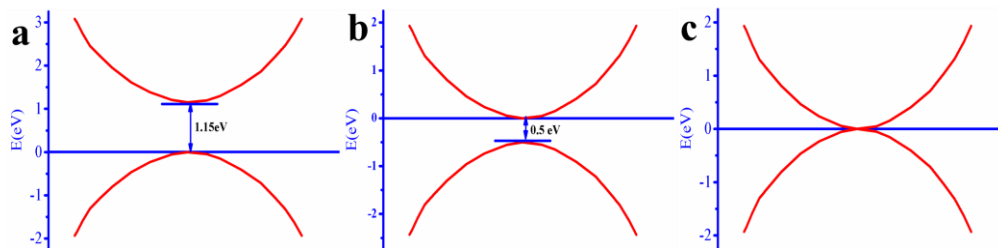

Fig. S16 the electronic band structure scheme of WO<sub>3</sub> (a), WO<sub>x</sub>-B (b) and WO<sub>x</sub>-S (c) on the around  $\Gamma$  point.

## References

- S1. R. Xu, R. Wu, Y. Shi, J. Zhang and B. Zhang, *Nano Energy*, 2016, **24**, 103-110.
- S2. J. Zheng, W. Zhou, T. Liu, S. Liu, C. Wang and L. Guo, *Nanoscale*, 2017, **9**, 4409-4418.
- S3. J. Yu, Q. Li, C.-Y. Xu, N. Chen, Y. Li, H. Liu, L. Zhen, V. P. Dravid and J. Wu, *J. Mater. Chem. A*, 2017, **5**, 3981-3986.
- S4. K. Yan and Y. Lu, *Small*, 2016, **12**, 2975-2981.
- S5. Y. Rao, H. Ning, X. Ma, Y. Liu, Y. Wang, H. Liu, J. Liu, Q. Zhao and M. Wu, *Carbon*, 2018, **129**, 335-341.
- S6. G. Liu, Z. Sun, X. Zhang, H. Wang, G. Wang, X. Wu, H. Zhang and H. Zhao, *J. Mater. Chem. A*, 2018, **6**, 19201-19209.
- S7. J.-T. Ren, G.-G. Yuan, C.-C. Weng and Z.-Y. Yuan, *ACS Sustain. Chem. Eng.*, 2018, **6**, 707-718.
- S8. C. Dong, T. Kou, H. Gao, Z. Peng and Z. Zhang, *Adv. Energy. Mater.*, 2018, **8**, 1701347.
- S9. S. Fu, J. Song, C. Zhu, G.-L. Xu, K. Amine, C. Sun, X. Li, M. H. Engelhard, D. Du and Y. Lin, *Nano Energy*, 2018, **44**, 319-326.
- S10. Y. Wang, C. Xie, Z. Zhang, D. Liu, R. Chen and S. Wang, *Adv. Funct. Mater.*, 2018, **28**, 1703363.
- S11. G. Chen, Z. Hu, Y. Zhu, Z.-G. Chen, Y. Zhong, H.-J. Lin, C.-T. Chen, L. H. Tjeng, W. Zhou and Z. Shao, *J. Mater. Chem. A*, 2018, **6**, 9854-9859.
- S12. Y. Zhou and H. C. Zeng, *Small*, 2018, **14**, 1704403.
- S13. H. Xu, Z. X. Shi, Y. X. Tong and G. R. Li, *Adv. Mater.*, 2018, **30**, 1705442.
- S14. M. Tariq, W. Q. Zaman, W. Sun, Z. Zhou, Y. Wu, L.-M. Cao and J. Yang, *ACS Sustain. Chem. Eng.*, 2018, **6**, 4854-4862.
- S15. G. Fu, X. Yan, Y. Chen, L. Xu, D. Sun, J. M. Lee and Y. Tang, *Adv. Mater.*, 2018, **30**, 1704609.
- S16. H. Fan, H. Yu, Y. Zhang, Y. Zheng, Y. Luo, Z. Dai, B. Li, Y. Zong and Q. Yan, *Angew. Chem.*, 2017, **129**, 12740-12744.
- S17. P. Chen, T. Zhou, L. Xing, K. Xu, Y. Tong, H. Xie, L. Zhang, W. Yan, W. Chu and C. Wu, *Angew. Chem. Int. Ed.*, 2017, **56**, 610-614.
